# Supplementary material for: Interspecies differences in the transcriptome response of corals to acute heat stress
Source: PeerJ. 2024 Dec 10;12:e18627. doi: 10.7717/peerj.18627 (PMC11639872; doi:10.7717/peerj.18627)
Supplement: Supplemental Information 5 [file peerj-12-18627-s005.xlsx]

## Sheet: Contents
Table S1	Sample information and assembly statistics
Table S2	Coral and Symbiodiniaceae species included in orthology-based analysis
Table S3	Characteristic domains of cnidarian stress response genes
Table S4	Characteristic domains of gene regulatory factors
Table S5	Raw and trimmed reads
Table S6	Assembly completeness based on BUSCO analysis
Table S7	Annotation rate
Table S8	Comparison of symbiont transcripts with other Symbiodiniaceae
Table S9	Orthologs overlap of host transcriptomes with other coral species
Table S10	Represented coral species in orthogroups
Table S11	Expanded orthogroups in corals indentified through KinFin
Table S12	Presence-absence of protein domains among Favites, Montipora, Acropora, and Seriatopora
Table S13	Relative abundance of SRGs in diverse coral species
Table S14	Discriminative protein domains between Complexa and Robusta representatives
Table S15	Discriminative protein domains among pocilloporids, merullinids, and acroporids
Table S16	Differentially expressed host and symbiont genes in four coral species at 4 and 24hr thermal stress
Table S17	Annotated differentially expressed host genes in F. colemani at 4hr thermal stress
Table S18	Annotated differentially expressed host genes in A. digitifera at 4hr thermal stress
Table S19	Annotated differentially expressed host genes in S. caliendrum at 4hr and 24hr thermal stress
Table S20	Enriched functions in the differentially expressed host genes in S. caliendrum
Table S21	Transcriptional regulators that are differentially expressed in S. caliendrum under thermal stress
Table S22	Stringdb matches of differentially expressed genes in S. caliendrum under thermal stress
Table S23	Enriched pathways in the differentially expressed host genes in S. caliendrum
Table S24	Components of DNA damage repair network in S. caliendrum
Table S25	Expression patterns of SRGs in F. colemani
Table S26	Expression patterns of SRGs in M. digitata
Table S27	Expression patterns of SRGs in A. digitifera
Table S28	Enriched PFAMs in front-loaded genes
Table S29	Expression patterns of SRGs in S. caliendrum
Table S30	Annotation of upregulated SRGs with low basal expression in S. caliendrum

## Sheet: TableS1
Table S1. Sample information and assembly statistics
Species	Favites colemani	Montipora digitata	Acropora digitifera	Seriatopora caliendrum		Platform:
Family	Merulinidae	Acroporidae	Acroporidae	Pocilloporidae		Hiseq 4000
Clade	Robusta	Complexa	Complexa	Robusta		Hiseq 2500
Form	Massive	Branching	Branching	Branching
Reproduction	Broadcasting	Broadcasting	Broadcasting	Brooding
Coordinates	N 16'24.708,E 119'54.270	N 16'26.513,E 119'56.494	N 16’17.287,E 120’00.448	N 16’22.293,E 120’00.228
Depth	2-3m	1-2m	5-7m	2-3m
De novo assembly
Total assembled bases	237860659	210842090	307206571	386456185
Total genes	259626	209689	181774	214416
Total transcripts	320382	265697	379872	284499
N50	1283	1355	1296	1773
G+C content (%)	46.73	45.94	44.71	44.29
CDHIT (90%)-filtered
Total genes	239325	190072	180231	195493
Total transcripts	267615	218127	276959	235403
N50	1195	1279	1178	1594
G+C content (%)	47	46.34	45.4	44.8
Longest peptides	112871	93723	163795	109130
IsoPct-filtered transcripts	237703	188998	179489	195001
Non-redundant protein-coding assembly
Total genes	91826	74353	93301	73726
N50	1677	1721	1801	1824
G+C content (%)	49.6	49.74	48.78	49.28
Transcript binning
Host transcripts	42546	29399	39666	27921
Symbiont transcripts	49280	44954	53635	45805
Host G+C content (%)	43.9306	42.5626	42.226	41.9653
Symbiont G+C content (%)	54.7061	55.1233	54.9398	55.928
Taxonomic matches
Host
Cnidaria	25681	22616	33918	24763
Others	16865	6783	5748	3158
Symbiont
Dinophyceae	27151	28708	31625	29383
Others	22129	16246	22010	16422
Final non-redundant metatranscriptomes
Total transcripts	52832	51324	65543	54146
Total transcripts ExN50	2123	2045	2379	2346
Host transcripts	25,681 (48.61%)	22,616 (44.07%)	33,918 (51.75%)	24,763 (45.73%)
Host G+C content (%)	42.82	42.51	42.03	41.78
Symbiont transcripts	27,151 (51.39%)	28,708 (55.93%)	31,625 (48.25%)	29,383 (54.27%)
Symbiont G+C content (%)	55.03	55.24	54.94	56.04

## Sheet: TableS2
Table S2. Coral and Symbiodiniaceae species included in orthology-based analysis. Sources of predicted peptide sequences are indicated.
Corals
Clade	Family	Species	Code	Reproduction	Data type	Number of peptides	Source
Robusta	Pocilloporidae	Pocillopora damicornis	Pdam*	Brooding	Genome	26, 077	Reef genomicsb
		Seriatopora caliendrum	Scal	Brooding	Transcriptome	24, 763	This study
		Seriatopora hystrix	Shys	Brooding	Transcriptome	27, 680	Reef genomicsb
	Leptastreidae	Leptastrea purpurea	Lpur	Broadcasting	Transcriptome	20, 913	Zhang et al., 2019c
	Merulinidae	Dipsastrea rotumana	Drot	Broadcasting	Transcriptome	27, 992	Zhang et al., 2019c
		Favites colemani	Fcol	Broadcasting	Transcriptome	25, 681	This study
		Favites acuticollis	Facu	Broadcasting	Transcriptome	22, 224	Zhang et al., 2019c
Complexa	Poritidae	Porites lutea	Plut	Broadcasting	Genome	31, 126	Reef genomicsb
	Acroporidae	Astreopora spp.	Aspp*	Broadcasting	Genome	28, 711	OIST genomicsa
		Montipora digitifera	Mdig	Broadcasting	Transcriptome	22, 616	This study
		Montipora cactus	Mcac*	Broadcasting	Genome	21, 982	OIST genomicsa
		Acropora tenuis	Aten*	Broadcasting	Genome	23, 118	OIST genomicsa
		Acropora digitifera	Adig	Broadcasting	Transcriptome	33, 918	This study
		Acropora digitifera	Adig*	Broadcasting	Genome	22, 326	OIST genomicsa
Octocoral	Helioporidae	Heliopora coerulea	Hcoe*	Brooding	Genome	27, 108	Ip et al., 2023d
Symbiodiniaceae
Clade	Species	Code	Data type	Number of peptides	Source
A	Symbiodinium microadriaticum	Smic*	Genome	49, 109	SAGER databasee
B	Breviolum minutum	Bmin*	Genome	47, 014	SAGER databasee
C	Cladocopium goreaui	Cgor*	Genome	35, 913	SAGER databasee
D	Durusdinium trenchii	Dtre*	Genome	36, 094	OIST genomicsa
F	Fugacium kawagutii	Fkaw*	Genome	36, 850	SAGER databasee
community	community	Scal symbionts	Transcriptome	29, 383	This study
		Mdig symbionts	Transcriptome	28, 708	This study
		Fcol symbionts	Transcriptome	27, 151	This study
		Adig symbionts	Transcriptome	31, 625	This study
a, https://marinegenomics.oist.jp/gallery
b, Liew YJ, Aranda M, Voolstra CR. 2016. Reefgenomics. Org-a repository for marine genomics data. Database 1: 2016.
c, Zhang Y, Chen Q, Xie JY, Yeung YH, Xiao B, Liao B, Xu J, Qiu JW. 2019. Development of a transcriptomic database for 14 species of scleractinian corals. BMC genomics 20:1-9.
d, Ip JCH, Ho MH, Chan BKK. et al. 2023. A draft genome assembly of reef-building octocoral Heliopora coerulea. Sci Data 10: 381.
e, Yu L, Li T, Li L, Lin X, Li H, Liu C, Guo C, Lin S. 2020. SAGER: a database of Symbiodiniaceae and Algal Genomic Resource. Database 1: 2020.

## Sheet: TableS3
Table S3. Characteristic domains of cnidarian stress response genes.
Stressor	PFAM Name	Accession
Chemical	ABC_tran	PF00005.24
Chemical	Aldedh	PF00171.19
Chemical	Aldo_ket_red	PF00248.18
Chemical	An_peroxidase	PF03098.12
Chemical	Ank	PF00023.27
Chemical	Cu-oxidase	PF00394.19
Chemical	Ferritin	PF00210.21
Chemical	FMO-like	PF00743.16
Chemical	GCS	PF03074.13
Chemical	Glutaredoxin	PF00462.21
Chemical	GSH_synth_ATP	PF03917.14
Chemical	GSH_synthase	PF03199.12
Chemical	GSHPx	PF00255.16
Chemical	GST_C	PF00043.22
Chemical	GST_N	PF02798.17
Chemical	Heme_oxygenase	PF01126.17
Chemical	HSP20	PF00011.18
Chemical	HSP70	PF00012.17
Chemical	HSP90	PF00183.15
Chemical	Ion_trans	PF00520.28
Chemical	OATP	PF03137.17
Chemical	p450	PF00067.19
Chemical	Phytochelatin	PF05023.11
Chemical	PMSR	PF01625.18
Chemical	Sod_Cu	PF00080.17
Chemical	Sod_Fe_N	PF00081.19
Chemical	Sulfotransfer_1	PF00685.24
Chemical	Thioredoxin	PF00085.17
Chemical	Transferrin	PF00405.14
Chemical	UDPGT	PF00201.15
Pathogen	7tm_1	PF00001.18
Pathogen	7tm_2	PF00002.21
Pathogen	7tm_3	PF00003.19
Pathogen	AMP-binding	PF00501.25
Pathogen	Asp	PF00026.20
Pathogen	BIR	PF00653.18
Pathogen	BTB	PF00651.28
Pathogen	CARD	PF00619.18
Pathogen	cNMP_binding	PF00027.26
Pathogen	DEAD_2	PF06733.12
Pathogen	Death	PF00531.19
Pathogen	DSL	PF01414.16
Pathogen	EGF	PF00008.24
Pathogen	EGF_2	PF07974.10
Pathogen	EGF_CA	PF07645.12
Pathogen	F-box	PF00646.30
Pathogen	FYVE	PF01363.18
Pathogen	Gln-synt_C	PF00120.21
Pathogen	Glyco_hydro_1	PF00232.15
Pathogen	Glycolytic	PF00274.16
Pathogen	ig	PF00047.22
Pathogen	Laminin_EGF	PF00053.21
Pathogen	Ldl_recept_a	PF00057.15
Pathogen	Lipoxygenase	PF00305.16
Pathogen	LRR_1	PF00560.30
Pathogen	MATH	PF00917.23
Pathogen	MMR_HSR1	PF01926.20
Pathogen	NACHT	PF05729.9
Pathogen	NMT	PF01233.16
Pathogen	NMT_C	PF02799.12
Pathogen	Pam16	PF03656.10
Pathogen	Pentapeptide	PF00805.19
Pathogen	Pkinase	PF00069.22
Pathogen	Pkinase_Tyr	PF07714.14
Pathogen	PLAT	PF01477.20
Pathogen	PP2C	PF00481.18
Pathogen	PSI	PF01437.22
Pathogen	RdRP	PF05183.9
Pathogen	SAM_1	PF00536.27
Pathogen	SAM_2	PF07647.14
Pathogen	SapB_1	PF05184.12
Pathogen	SapB_2	PF03489.14
Pathogen	SRCR	PF00530.15
Pathogen	TIR	PF01582.17
Pathogen	TPR_1	PF00515.25
Pathogen	TPR_2	PF07719.14
Pathogen	TPR_4	PF07721.11
Pathogen	Tsg101	PF05743.10
Pathogen	ubiquitin	PF00240.20
Pathogen	UCH	PF00443.26
Pathogen	WAP	PF00095.18
Wound	Activin_recp	PF01064.20
Wound	Cadherin	PF00028.14
Wound	Collagen	PF01391.15
Wound	CP2	PF04516.12
Wound	FG-GAP	PF01839.20
Wound	FGF	PF00167.15
Wound	fn2	PF00040.16
Wound	fn3	PF00041.18
Wound	Gal_Lectin	PF02140.15
Wound	Glypican	PF01153.16
Wound	Hemopexin	PF00045.16
Wound	Integrin_B_tail	PF07965.9
Wound	Integrin_beta	PF00362.15
Wound	Laminin_B	PF00052.15
Wound	Laminin_G_1	PF00054.20
Wound	Laminin_G_2	PF02210.21
Wound	Laminin_N	PF00055.14
Wound	Lectin_C	PF00059.18
Wound	Lectin_leg-like	PF03388.10
Wound	LRRNT	PF01462.15
Wound	MH2	PF03166.11
Wound	NIDO	PF06119.11
Wound	Somatomedin_B	PF01033.14
Wound	TB	PF00683.14
Wound	TGF_beta	PF00019.17
Wound	TNF	PF00229.15
Wound	TSP_1	PF00090.16
Wound	TSP_3	PF02412.15
Wound	TSP_C	PF05735.9
Wound	VWA	PF00092.25
Wound	VWC	PF00093.15
Wound	VWD	PF00094.22
Reference:
Reitzel, Adam M., James C. Sullivan, Nikki Traylor-Knowles, and John R. Finnerty. 2008. “Genomic Survey of Candidate Stress-Response Genes in the Estuarine Anemone Nematostella Vectensis.” The Biological Bulletin 214 (3): 233–54.

## Sheet: TableS4
Table S4. Characteric domains of gene regulatory factors.
Type	Annotation	PFAM Name	Accession
DNA methylation	DNMT1	DNA_methylase	PF00145.14
DNA methylation	TET	Tet_JBP	PF12851.4
DNA methylation	TDG	UDG	PF03167.16
DNA methylation	meCpG reader	MBD	PF01429.16
Histone	Histone	Histone	PF00125.21
Histone	Histone	Linker_histone	PF00538.16
Histone acetylation	HAT (MYST)	MOZ_SAS	PF01853.15
Histone acetylation	HAT (MYST)	NuA4	PF09340.7
Histone acetylation	HAT (GNAT)	HAT_KAT11	PF08214.8
Histone acetylation	HAT (GNAT)	ELP6	PF09807.6
Histone acetylation	HAT (GNAT)	Hat1_N	PF10394.6
Histone acetylation	HDAC	Hist_deacetyl	PF00850.16
Histone acetylation	HDAC	SIR2	PF02146.14
Histone methylation	HMT	SET	PF00856.25
Histone methylation	HDM	JmjC	PF02373.19
Histone methylation	HDM	SWIRM	PF04433.14
Histone methylation	HA reader	Bromodomain	PF00439.22
Histone methylation	HM reader	Chromo	PF00385.21
Histone methylation	HM reader	WD40	PF00400.29
Histone methylation	HM reader	TUDOR	PF00567.21
Histone methylation	HM reader	PHD	PF00628.26
Transcription factor	TF	HLH	PF00010
Transcription factor	TF	zf-C2H2	PF00096
Transcription factor	TF	zf-C4	PF00105
Transcription factor	TF	Pou	PF00157
Transcription factor	TF	bZIP_1	PF00170
Transcription factor	TF	Ets	PF00178
Transcription factor	TF	Myb_DNA-binding	PF00249
Transcription factor	TF	Fork_head	PF00250
Transcription factor	TF	PAX	PF00292
Transcription factor	TF	SRF-TF	PF00319
Transcription factor	TF	GATA	PF00320
Transcription factor	TF	TBP	PF00352
Transcription factor	TF	HSF_DNA-bind	PF00447
Transcription factor	TF	HMG_box	PF00505
Transcription factor	TF	Linker_histone	PF00538
Transcription factor	TF	RHD	PF00554
Transcription factor	TF	IRF	PF00605
Transcription factor	TF	DM	PF00751
Transcription factor	TF	Runt	PF00853
Transcription factor	TF	P53	PF00870
Transcription factor	TF	T-box	PF00907
Transcription factor	TF	TEA	PF01285
Transcription factor	TF	SAND	PF01342
Transcription factor	TF	HTH_3	PF01381
Transcription factor	TF	ARID	PF01388
Transcription factor	TF	zf-C2HC	PF01530
Transcription factor	TF	TFIIE_alpha	PF02002
Transcription factor	TF	zf-CXXC	PF02008
Transcription factor	TF	SAP	PF02037
Transcription factor	TF	CBFB_NFYA	PF02045
Transcription factor	TF	AT_hook	PF02178
Transcription factor	TF	TFIIE_beta	PF02186
Transcription factor	TF	RFX_DNA_binding	PF02257
Transcription factor	TF	E2F_TDP	PF02319
Transcription factor	TF	CUT	PF02376
Transcription factor	TF	DDT	PF02791
Transcription factor	TF	STAT_bind	PF02864
Transcription factor	TF	bZIP_Maf	PF03131
Transcription factor	TF	MH1	PF03165
Transcription factor	TF	HTH_Tnp_Tc5	PF03221
Transcription factor	TF	GCM	PF03615
Transcription factor	TF	CENP-B_N	PF04218
Transcription factor	TF	RNA_pol_Rpb2_2	PF04561
Transcription factor	TF	HNF-1_N	PF04814
Transcription factor	TF	DNA_pol_phi	PF04931
Transcription factor	TF	AKAP95	PF04988
Transcription factor	TF	HTH_psq	PF05225
Transcription factor	TF	THAP	PF05485
Transcription factor	TF	Homeobox	PF05920
Transcription factor	TF	H2TH	PF06831
Transcription factor	TF	HSA	PF07529
Transcription factor	TF	bZIP_2	PF07716
Transcription factor	TF	HTH_9	PF08221
Transcription factor	TF	HMG_box_2	PF09011
Transcription factor	TF	BTD	PF09270
Transcription factor	TF	LAG1-DNAbind	PF09271
Transcription factor	TF	BrkDBD	PF09607
Transcription factor	TF	Phospho_p8	PF10195
Transcription factor	TF	BHD_1	PF10403
Transcription factor	TF	Nrf1_DNA-bind	PF10491
Transcription factor	TF	WAC_Acf1_DNA_bd	PF10537
Transcription factor	TF	Homez	PF11569
Transcription factor	TF	zf-C2H2_jaz	PF12171
Transcription factor	TF	TMF_DNA_bd	PF12329
Transcription factor	TF	Myb_DNA-bind_4	PF13837
Transcription factor	TF	DBINO	PF13892
Transcription factor	TF	Myb_DNA-bind_6	PF13921
Transcription factor	TF	PHD_3	PF13922
References:
de Mendoza Alex, William L. Hatleberg, Kevin Pang, Sven Leininger, Ozren Bogdanovic, Jahnvi Pflueger, Sam Buckberry, et al. 2019. “Convergent Evolution of a Vertebrate-like Methylome in a Marine Sponge.” Nature Ecology & Evolution 3 (10): 1464–73.
Lee, Kenneth K., and Jerry L. Workman. 2007. “Histone Acetyltransferase Complexes: One Size Doesn’t Fit All.” Nature Reviews. Molecular Cell Biology 8 (4): 284–95.
Seto, Edward, and Minoru Yoshida. 2014. “Erasers of Histone Acetylation: The Histone Deacetylase Enzymes.” Cold Spring Harbor Perspectives in Biology 6 (4): a018713.
Kooistra, Susanne Marije, and Kristian Helin. 2012. “Molecular Mechanisms and Potential Functions of Histone Demethylases.” Nature Reviews. Molecular Cell Biology 13 (5): 297–311.
Bahrami, Shahram, Rezvan Ehsani, and Finn Drabløs. 2015. “A Property-Based Analysis of Human Transcription Factors.” BMC Research Notes 8 (March):82.

## Sheet: TableS5
Table S5. Raw and trimmed reads
Sample ID	Species	Time (hr)	Temperature (°C)	Raw reads	Trimmed reads	BioProject
F2	Favites colemani	4	28	34821226	21484380	BioProject PRJNA422022
Y11	Favites colemani	4	28	29533206	24709314	BioProject PRJNA422022
Z2	Favites colemani	4	28	35616936	29715582	BioProject PRJNA422022
CL10	Favites colemani	24	28	28158052	23413010	BioProject PRJNA422022
Y13	Favites colemani	24	28	31380298	26350342	BioProject PRJNA422022
Z4	Favites colemani	24	28	33023430	26664468	BioProject PRJNA422022
F6	Favites colemani	4	32	33643714	28097890	BioProject PRJNA422022
CI13	Favites colemani	4	32	32858754	27334898	BioProject PRJNA422022
Z6	Favites colemani	4	32	33730960	28060204	BioProject PRJNA422022
F8	Favites colemani	24	32	34090126	28519550	BioProject PRJNA422022
Y17	Favites colemani	24	32	33640898	28106974	BioProject PRJNA422022
Z8	Favites colemani	24	32	32004560	26326918	BioProject PRJNA422022
			total	392502160	318,783,530 (81.22%)
S1	Montipora digitata	4	28	26151314	21484380	BioProject PRJNA422015
T1	Montipora digitata	4	28	35733618	29904938	BioProject PRJNA422015
H1	Montipora digitata	4	28	29475162	24582104	BioProject PRJNA422015
S2	Montipora digitata	24	28	27492218	22770074	BioProject PRJNA422015
T2	Montipora digitata	24	28	32237772	26453258	BioProject PRJNA422015
H3	Montipora digitata	24	28	32998858	27834312	BioProject PRJNA422015
S3	Montipora digitata	4	32	28759940	23830792	BioProject PRJNA422015
T3	Montipora digitata	4	32	34553086	29189782	BioProject PRJNA422015
H5	Montipora digitata	4	32	34250360	28532704	BioProject PRJNA422015
S4	Montipora digitata	24	32	28546204	23584112	BioProject PRJNA422015
T4	Montipora digitata	24	32	28807368	24138150	BioProject PRJNA422015
H7	Montipora digitata	24	32	29741186	24702936	BioProject PRJNA422015
			total	368747086	307,007,542 (83.26%)
AA1	Acropora digitifera	4	28	33009096	28245088	BioProject PRJNA421253
Az5	Acropora digitifera	4	28	41836004	31833652	BioProject PRJNA421253
Az9	Acropora digitifera	4	28	58289778	41939286	BioProject PRJNA421253
Az2	Acropora digitifera	24	28	63375524	45052498	BioProject PRJNA421253
Az6	Acropora digitifera	24	28	41739718	28900172	BioProject PRJNA421253
Az10	Acropora digitifera	24	28	43863834	30670410	BioProject PRJNA421253
Az3	Acropora digitifera	4	32	61269840	44171026	BioProject PRJNA421253
Az7	Acropora digitifera	4	32	60640126	42395846	BioProject PRJNA421253
Az11	Acropora digitifera	4	32	51357998	36780662	BioProject PRJNA421253
Az4	Acropora digitifera	24	32	59837792	43797318	BioProject PRJNA421253
Az8	Acropora digitifera	24	32	55644114	40687268	BioProject PRJNA421253
Az12	Acropora digitifera	24	32	38862580	30239008	BioProject PRJNA421253
			total	609726404	444,712,234 (72.94%)
SC1	Seriatopora caliendrum	4	28	46910894	37088954	BioProject PRJNA422012
SC10	Seriatopora caliendrum	4	28	59147690	47698786	BioProject PRJNA422012
AY2	Seriatopora caliendrum	4	28	61812600	48525298	BioProject PRJNA422012
SC3	Seriatopora caliendrum	24	28	59795960	47435612	BioProject PRJNA422012
SC11	Seriatopora caliendrum	24	28	52932142	42624104	BioProject PRJNA422012
AY4	Seriatopora caliendrum	24	28	61352086	49559828	BioProject PRJNA422012
SC5	Seriatopora caliendrum	4	32	58563224	46888110	BioProject PRJNA422012
SC14	Seriatopora caliendrum	4	32	57020542	45713884	BioProject PRJNA422012
AY6	Seriatopora caliendrum	4	32	49321738	38819854	BioProject PRJNA422012
SC7	Seriatopora caliendrum	24	32	66884576	53816296	BioProject PRJNA422012
SC16	Seriatopora caliendrum	24	32	60929312	48802894	BioProject PRJNA422012
AY7	Seriatopora caliendrum	24	32	53413332	42464016	BioProject PRJNA422012
			total	688084096	549,437,636 (79.85%)

## Sheet: TableS6
Table S6. Assembly completeness based on BUSCO analysis
Database	F. colemani host	M. digitata host	A. digitifera host	S. caliendrum host
Eukaryota (n=303)	C:92.1%[S:88.8%,D:3.3%],F:5.9%,M:2.0%	C:96.3%[S:95.0%,D:1.3%],F:1.3%,M:2.4%	C:96.4%[S:73.3%,D:23.1%],F:1.7%,M:1.9%	C:90.1%[S:86.5%,D:3.6%],F:3.6%,M:6.3%
Metazoa (n=978)	C:92.0%[S:89.0%,D:3.0%],F:3.8%,M:4.2%	C:93.0%[S:91.2%,D:1.8%],F:1.4%,M:5.6%	C:93.8%[S:69.7%,D:24.1%],F:1.8%,M:4.4%	C:90.9%[S:89.4%,D:1.5%],F:2.2%,M:6.9%
Database	F. colemani symbionts	M. digitata symbionts	A. digitifera symbionts	S. caliendrum symbionts
Eukaryota (n=303)	C:62.4%[S:56.1%,D:6.3%],F:3.3%,M:34.3%	C:61.7%[S:55.8%,D:5.9%],F:3.6%,M:34.7%	C:60.1%[S:49.5%,D:10.6%],F:4.6%,M:35.3%	C:58.1%[S:52.5%,D:5.6%],F:7.9%,M:34.0%
Alveolata (n=171)	C:70.8%[S:57.9%,D:12.9%],F:4.1%,M:25.1%	C:69.0%[S:56.7%,D:12.3%],F:4.1%,M:26.9%	C:67.3%[S:51.5%,D:15.8%],F:4.1%,M:28.6%	C:66.7%[S:55.6%,D:11.1%],F:7.6%,M:25.7%

## Sheet: TableS7
Table S7. Annotation rate
Host	Total peptides	UniProt+PFAM+GO	UniProt+PFAM	UniProt+GO	PFAM+GO	UniProt	PFAM	Annotated peptides	% annotated
Favites colemani	25681	14604	363	1671	895	132	1187	18852	73.41
Montipora digitata	22616	12714	352	1443	729	129	1052	16419	72.6
Acropora digitifera	33918	17030	453	2423	1110	190	1547	22753	67.08
Seriatopora caliendrum	24763	14029	326	1574	882	121	1104	18036	72.83
Symbiont	Total peptides	UniProt+PFAM+GO	UniProt+PFAM	UniProt+GO	PFAM+GO	UniProt	PFAM	Annotated peptides	% annotated
Favites colemani	27151	10928	222	859	1838	52	1822	15721	57.9
Montipora digitata	28708	11250	222	883	1877	47	1908	16187	56.38
Acropora digitifera	31625	11804	244	1109	2055	57	2101	17370	54.92
Seriatopora caliendrum	29383	11097	206	978	1964	52	1928	16225	55.22

## Sheet: TableS8
Table S8. Comparison of symbiont transcripts with other Symbiodiniaceae
Ave. 1-1 identity (%)	Smic	Bmin	Cgor	Dtre	Fkaw	Fcol symbionts	Mdig symbionts	Adig symbionts	Scal symbionts
Fcol symbionts	59.22	73.46	79.18	62.69	59.89	100	89.26	96.37	68.34
Mdig symbionts	59.08	73.05	74.85	62.4	59.61	88.99	100	88.45	68.06
Adig2 symbionts	59.23	73.38	78.95	62.54	59.73	96.89	89.04	100	68.22
Scal symbionts	59.4	67.43	60.7	83.35	55.19	68.68	68.61	68.39	100
% hits	Smic	Bmin	Cgor	Dtre	Fkaw	Fcol symbionts	Mdig symbionts	Adig symbionts	Scal symbionts
Fcol symbionts	99.8158	96.6005	85.1939	90.2803	74.4171	100	96.53	96.56	94.07
Mdig symbionts	99.8467	96.6421	83.9174	89.9854	73.3802	96.22	100	95.15	93.97
Adig2 symbionts	99.8198	96.3542	83.6395	89.2395	71.8767	97.4419	95.98	100	93.35
Scal symbionts	99.8434	95.6199	82.238	91.6993	71.6639	94.39	94.64	93.4	100
Top hits	Smic	Bmin	Cgor	Dtre	Fkaw	no hit
Fcol symbionts	981	7293	15003	1857	2015	2
Mdig symbionts	1138	8278	14662	2140	2487	3
Adig symbionts	1200	8862	17084	2181	2294	4
Scal symbionts	1242	4160	2673	19890	1418	0

## Sheet: TableS9
Table S9. Orthologs overlap of host transcriptomes with other coral species.
	Pdam*	Scal	Shys	Lpur	Drot	Fcol	Facu	Plut	Aspp*	Mdig	Mcac*	Aten*	Adig	Adig*	Hcoe*
Pdam*		0.849658	0.811569	0.855833	0.808537	0.822555	0.845803	0.850772	0.834488	0.837683	0.857108	0.846944	0.791852	0.842454	0.828276
Scal	0.819619		0.833985	0.841762	0.798859	0.809949	0.827136	0.790596	0.785591	0.823508	0.804549	0.792266	0.779894	0.792271	0.781507
Shys	0.734946	0.782925		0.806223	0.776975	0.747666	0.772476	0.721072	0.719843	0.760849	0.740374	0.724414	0.723443	0.72608	0.743395
Lpur	0.725068	0.739284	0.75425		0.782898	0.75598	0.794654	0.731598	0.712598	0.75467	0.736637	0.729088	0.71371	0.729252	0.738665
Drot	0.762602	0.781089	0.809237	0.871593		0.828484	0.867159	0.771276	0.757717	0.810278	0.781722	0.76776	0.766129	0.766241	0.778204
Fcol	0.822275	0.839348	0.825335	0.892016	0.878088		0.898522	0.827367	0.81622	0.865959	0.841348	0.826121	0.817088	0.82652	0.813995
Facu	0.771594	0.782219	0.778171	0.855673	0.838726	0.819966		0.777162	0.764016	0.804899	0.786921	0.773497	0.760359	0.773596	0.772938
Plut	0.836921	0.806228	0.783286	0.849481	0.80442	0.814174	0.838038		0.839764	0.840881	0.863038	0.849706	0.79644	0.850963	0.832203
Aspp*	0.721935	0.704541	0.687679	0.727667	0.695002	0.706371	0.724537	0.738522		0.75656	0.824858	0.773213	0.710442	0.76552	0.741789
Mdig	0.785014	0.800014	0.787348	0.834767	0.80507	0.811789	0.826837	0.801053	0.819528		0.857352	0.830229	0.828629	0.831134	0.801589
Mcac*	0.718733	0.699386	0.685572	0.729115	0.695002	0.705758	0.723342	0.735683	0.799528	0.767173		0.779588	0.714613	0.785998	0.734113
Aten*	0.814578	0.789916	0.76937	0.827692	0.782898	0.794821	0.815487	0.83076	0.859606	0.852075	0.894151		0.833704	0.933232	0.820421
Adig	0.775886	0.792176	0.782759	0.82544	0.795898	0.800886	0.816682	0.793297	0.804646	0.866395	0.835012	0.849352		0.854856	0.793913
Adig*	0.795913	0.775934	0.757485	0.813219	0.767514	0.781124	0.80115	0.817256	0.835984	0.837901	0.88554	0.916708	0.824249		0.800161
Hcoe*	0.632153	0.618318	0.626523	0.665434	0.629713	0.621465	0.646655	0.645662	0.654409	0.652831	0.668156	0.651038	0.618395	0.646406

[truncated: 21 more sheets: TableS10, TableS11, TableS12, Table S13, TableS14, TableS15, TableS16, TableS17, TableS18, TableS19, TableS20, TableS21, TableS22, TableS23, TableS24, TableS25, TableS26, TableS27, TableS28, TableS29 …]
